# Supplementary material for: KCNJ13 Gene Deletion Impairs Cell Alignment and Phagocytosis in Retinal Pigment Epithelium Derived from Human-Induced Pluripotent Stem Cells
Source: PubMed Central journal article supplement — Invest Ophthalmol Vis Sci. 2020 May 21;61(5):38. doi: 10.1167/iovs.61.5.38 (PMC7405706; doi:10.1167/iovs.61.5.38), 2020-05-21
Supplement: iovs-61-5-38_s001.pdf [file iovs-61-5-38_s001.pdf]

## **Supplementary Material**

### ***KCNJ13* gene deletion impairs cell alignment and phagocytosis in retinal pigment epithelium derived from human induced pluripotent stem cells**

#### **Kir7.1 regulates RPE alignment and phagocytosis**

Yuki Kanzaki,<sup>1,2</sup> Hirofumi Fujita,<sup>2</sup> Keita Sato,<sup>2</sup> Mio Hosokawa,<sup>1</sup> Hiroshi Matsumae,<sup>1</sup> Fumio Shiraga,<sup>1</sup> Yuki Morizane,<sup>1</sup> and Hideyo Ohuchi,<sup>2</sup>

<sup>1</sup> Department of Ophthalmology, Okayama University Graduate School of Medicine, Dentistry, and Pharmaceutical Sciences, Okayama, Japan

<sup>2</sup> Department of Cytology and Histology, Okayama University Graduate School of Medicine, Dentistry and Pharmaceutical Sciences, Okayama, Japan

## Supplementary Figures

### Supplemental Fig.1

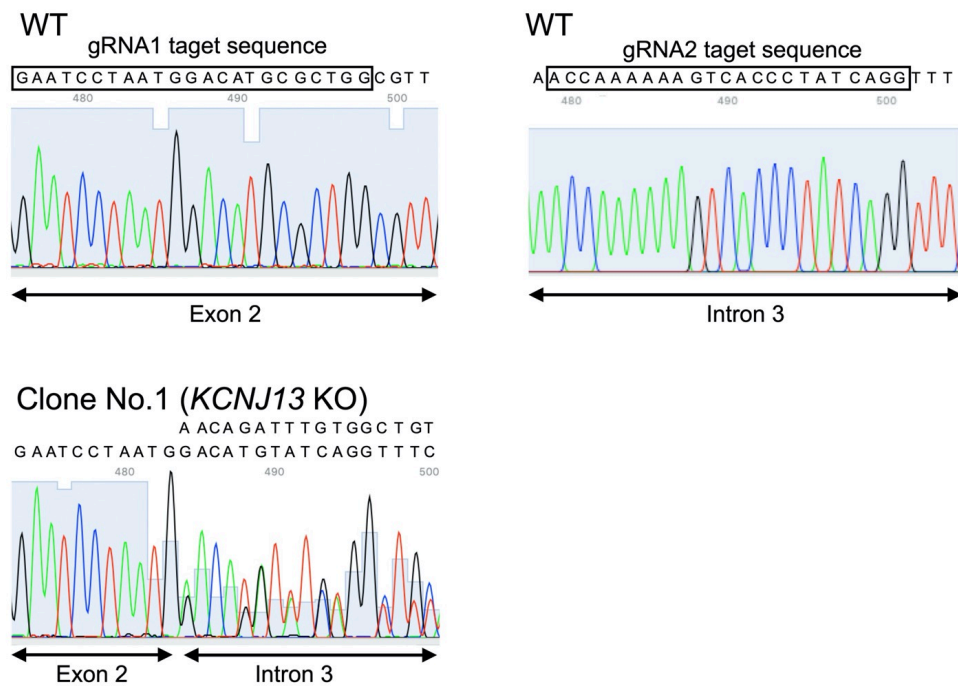

**Supplementary Figure S1.** Genomic DNA was extracted from WT and clone No.1 iPSCs and subjected to PCR. Sequence analysis of the obtained PCR products was performed. We confirmed that the *KCNJ13* gene was knocked out in the clone No. 1 iPSCs.

## Supplemental Fig.2

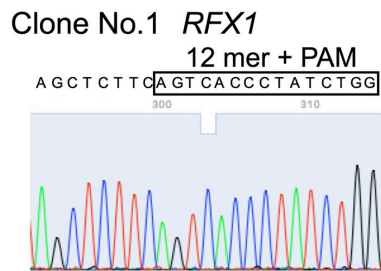

**Supplementary Figure S2.** The absence of off-target mutations by *KCNJ13* gRNAs was confirmed by DNA sequencing. Candidate off-target sites include the *RFX1* gene, which has a sequence in accordance with 12 mer + PAM of *KCNJ13* gRNA1 target sequence. We confirmed that no gene editing occurred in the *RFX1* gene in all the *KCNJ13*-edited iPSCs.

## Supplemental Fig.3

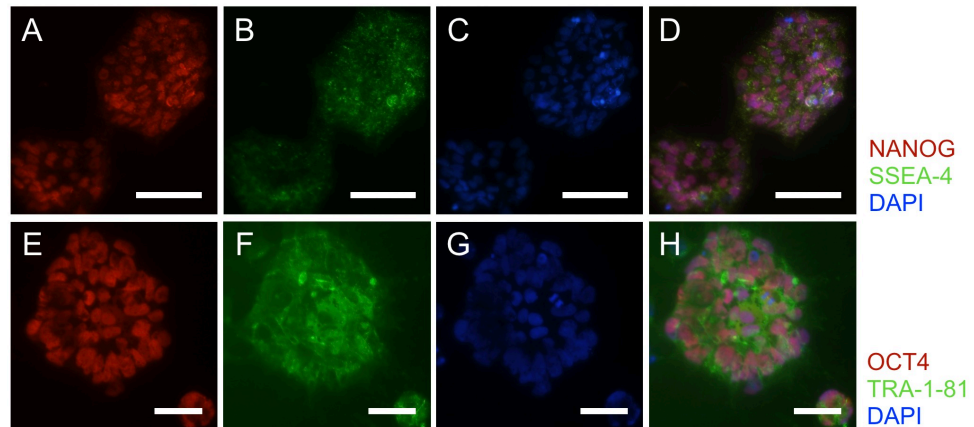

**Supplementary Figure S3.** Expression of undifferentiation markers in the *KCNJ13*-KO iPSCs. Immunofluorescence images for NANOG (A), SSEA-4 (B), OCT4 (E), and TRA-1-81 (F) are shown. (C, G) Nuclei are stained with DAPI. (D, H) Merged views. Scale bar = 100  $\mu\text{m}$  (A-D), 50  $\mu\text{m}$  (E-H).

## Supplemental Fig.4

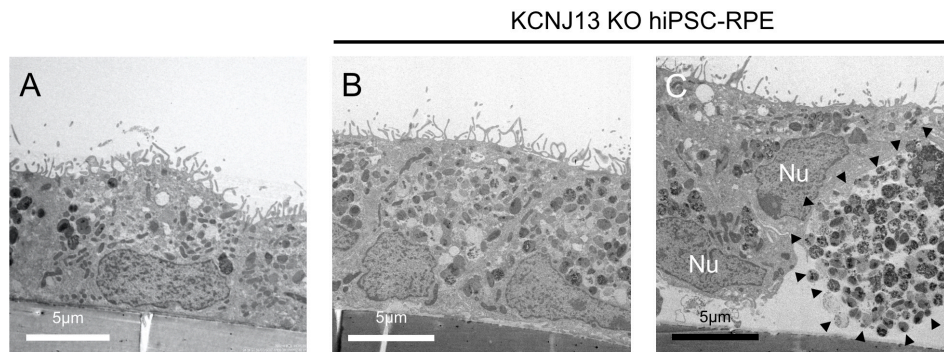**Supplementary Figure S4.**

Transmission electron microscopic images of WT (**A**) and *KCNJ13* KO (**B**, **C**) hiPSC-RPE cells. (**A**) Monolayer of WT hiPSC-RPE cells with apical microvilli. (**B**) These *KCNJ13*-KO hiPSC-RPE cells are also single-layered and have apical microvilli. (**C**) Double-layered *KCNJ13*-KO hiPSC-RPE cells and an exploded cell with debris. Cell contents are released basolaterally (arrowheads) to the living RPE cells. Nu, nucleus.

## Supplemental Fig.5

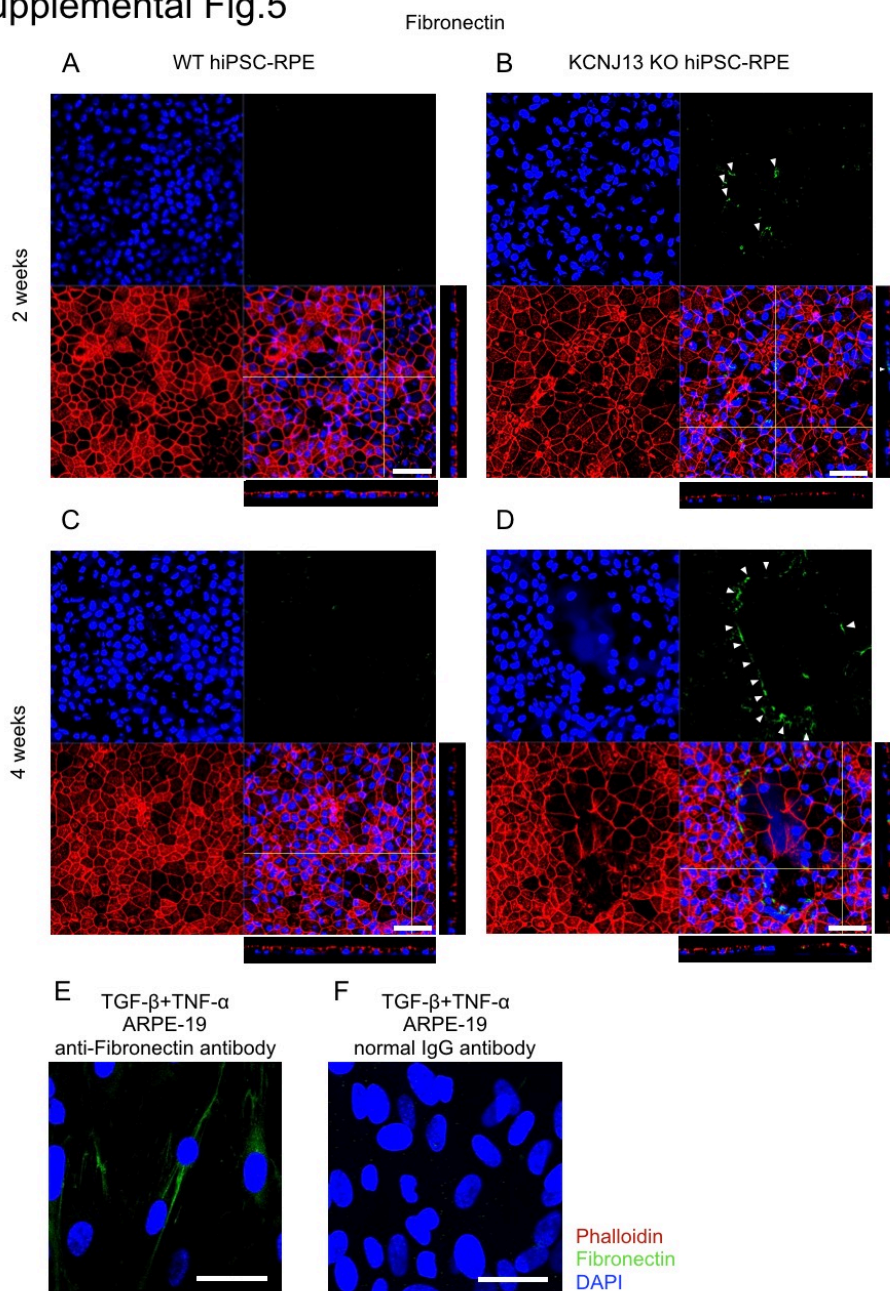**Supplementary Figure S5.**

Immunofluorescence of Fibronectin as a mesenchymal marker. Fibronectin is not detected in the WT hiPSC-RPE cells at 2 weeks (**A**) and 4 weeks (**C**) after seeding. Fibronectin is detected in the *KCNJ13*-KO hiPSC-RPE cells at 2 weeks (**B**) and 4 weeks (**D**) after seeding (arrowheads). (**E**) Localization of Fibronectin in ARPE-19 cells supplemented with TGF-β and TNF-α, shown as a positive control. Culture of ARPE-19 cells was performed according to Matoba et al<sup>19</sup>. (**F**) Negative control for immunofluorescence. Scale bar = 50 μm.



## Supplemental Fig.6

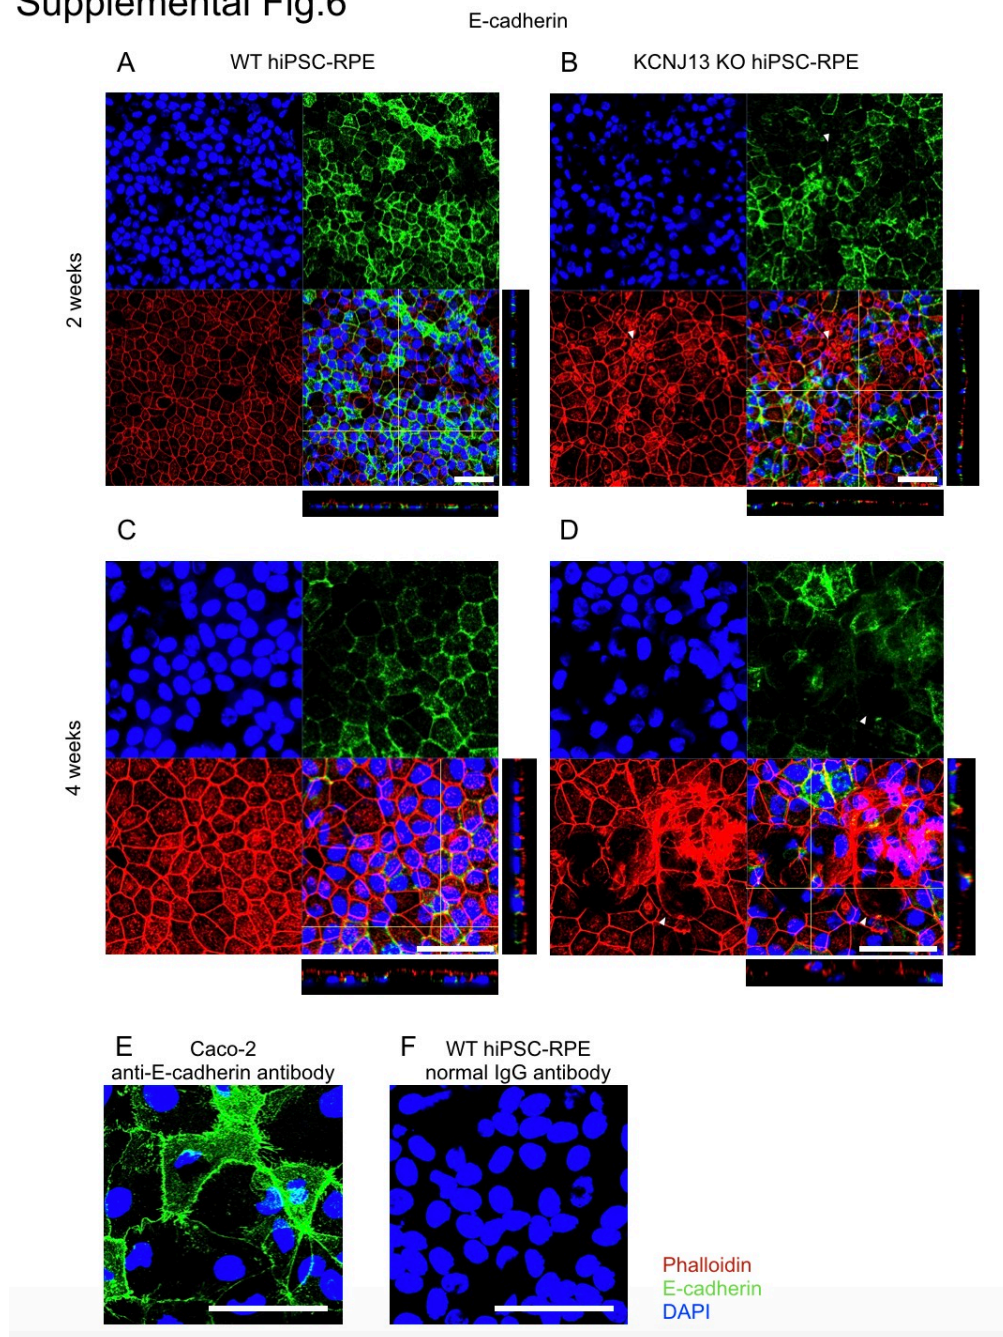**Supplementary Figure S6.**

Immunofluorescence of E-cadherin as an epithelial marker. E-cadherin is detected in the WT hiPSC-RPE cells at 2 weeks (**A**) and 4 weeks (**C**) after seeding. E-cadherin is detected in the *KCNJ13*-KO hiPSC-RPE cells at 2 weeks (**B**) and 4 weeks (**D**) after seeding. (**E**) Localization of E-cadherin in Caco-2 cells is shown as a positive control. Culture of Caco-2 cells was performed according to Fujita et al<sup>25</sup>. (**F**) Negative control for immunofluorescence. Scale bar = 50  $\mu$ m.

## Supplemental Fig.7

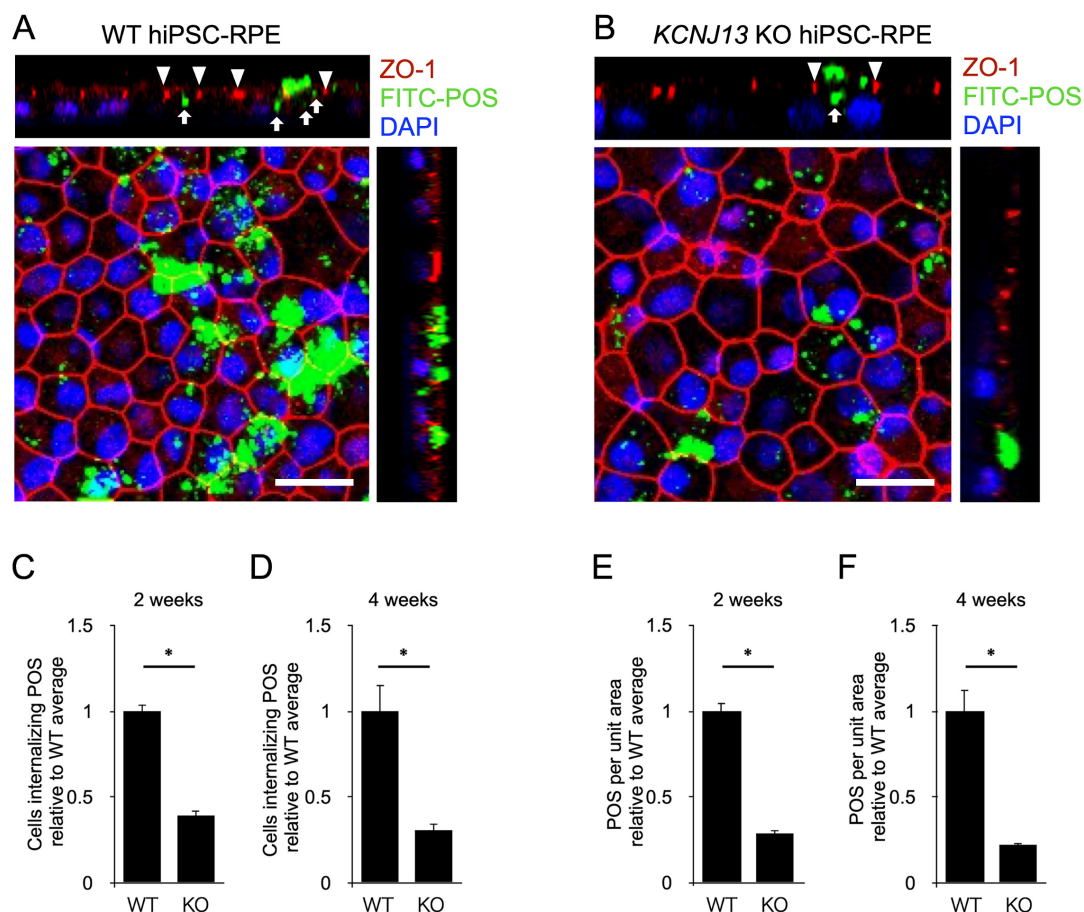**Supplementary Figure S7.**

Phagocytic activity of WT and *KCNJ13*-KO hiPSC-RPE cells. **(A)** Confocal microscope images of WT hiPSC-RPE 4 weeks after seeding. The Z-stack image shows that FITC-POS (green, arrows) are internalized below ZO-1 (red, arrowheads). **(B)** Confocal microscope images of *KCNJ13*-KO hiPSC-RPE 4 weeks after seeding. The Z-stack image shows that FITC-POS are not taken up into cells below ZO-1 (arrowheads). **(C, D)** The ratio of cells phagocytosing FITC-POS relative to WT cells in 2 **(C)** or 4 **(D)** weeks after seeding (2 weeks, WT:  $1.0 \pm 0.037$ , KO:  $0.39 \pm 0.029$ ,  $p < 0.001$ ; 4 weeks, WT:  $1.0 \pm 0.15$ , KO:  $0.31 \pm 0.033$ ,  $p < 0.001$ ) (WT and KO,  $n = 6$  for each). **(E, F)** The number FITC-POS per area relative to WT cells in 2 **(E)** or 4 **(F)** weeks (2 weeks, WT:  $1.0 \pm 0.049$ , KO:  $0.29 \pm 0.018$ ,  $p < 0.001$ ; 4 weeks, WT:  $1.0 \pm 0.13$ , KO:  $0.23 \pm 0.012$ ,  $p < 0.001$ ) (WT and KO,  $n = 6$  for each). Data are shown as mean  $\pm$  SE. Scale bar = 20  $\mu$ m.



## Supplementary Methods

### Culture of human iPSC cells and differentiation into RPE

Undifferentiated hiPSCs were maintained on mouse embryo fibroblast (MEF) feeder cells in Primate ES medium (ReproCELL, Yokohama, Japan) supplemented with 5 ng/ml basic fibroblast growth factor ( $\beta$ FGF; ReproCELL) and fresh medium was added daily. hiPSCs were passaged in small clumps after treatment with dissociation solution for iPSCs and replaced onto MEFs every 7 days. To directly differentiate into RPE cells, hiPSCs were cultured on gelatin-coated dishes in differentiation medium (Glasgow minimal essential medium [GMEM]; Thermo Fisher Scientific) supplemented with 1 mM sodium pyruvate, 0.1 mM non-essential amino acids, 0.1 mM 2-mercaptoethanol and 20% KnockOut™ Serum Replacement (KSR) (Thermo Fisher Scientific) for 4 days, GMEM and 15% KSR for 6 days, and GMEM and 10% KSR for 18 days. At 4 weeks, pigmented cells with a typical RPE cobblestone appearance appeared focally and the differentiation medium was switched to serum-free RPE medium (SFRM) containing Dulbecco's Modified Eagle Medium/Nutrient Mixture F-12 (DMEM/F12) [7:3] supplemented with GIBCO™ B-27™ Supplement (Thermo Fisher Scientific) and 2 mM L-glutamine for 7 days. Pure populations of pigmented cells were obtained by transferring pigmented colonies to SFRM supplemented with 10 ng/ml  $\beta$ FGF and 0.5  $\mu$ M SB431542 (Cat. no. S4317; Sigma-Aldrich, St. Louis, MO). The differentiation medium was changed every three days.

### Gene editing of hiPSCs via CRISPR-Cas9 system

Undifferentiated hiPSCs were cultured in feeder-free conditions. One hour before electroporation, Y-27632 was added to the medium at a final concentration of 10  $\mu$ M. After washing in PBS, hiPSCs were dissociated with 0.25% trypsin. Then the medium was added and the cells were suspended into single cells. After centrifugation (120 g, 5 min) at room temperature, the supernatant was removed, the medium was added, and the cells were re-suspended. After a second centrifugation, the number of cells were counted and  $1.0 \times 10^6$  cells were prepared in Opti-MEM, and subsequently transferred to a cuvette for electroporation. One  $\mu$ g of Cas9 protein (IDT) and 0.5  $\mu$ g of each gRNA were added to the cells. Electroporation was performed by using a NEPA 21 electroporator (Nepa Gene, Ichikawa, Japan) under the conditions described by Li et al.<sup>18</sup> (poring pulse: pulse voltage, 125 V; pulse width, 5 ms; pulse number, 2). After electroporation, the cells were placed onto the feeder-free plate containing medium with Y-27632 (10  $\mu$ M) and subsequently passaged. The gene-edited iPSCs were cloned according to Park et al.<sup>17</sup>: Approximately 100 cells were cultured and each single cell was marked; when the diameter of colonies grown from marked

cells was diameter of 300–400  $\mu\text{m}$ , each colony was picked with a 1,000  $\mu\text{l}$  micro-pipette tip. The isolated colonies were seeded onto a 3.5 cm-dish, expanded for DNA extraction, and genomic DNA was isolated for PCR analysis. After confirmation of targeted gene editing by sequencing (as described below), the cells were cultured on feeder cells.

### Sequencing analysis

To confirm whether the *KCNJ13* gene was precisely edited in the target sites, the genomic DNA was examined by PCR. Genomic DNA from gene-edited hiPSCs was extracted with a commercial kit (DNeasy Blood and Tissue Kit; Qiagen, Hilden, Germany) following manufacturer's protocol, and quantified using a spectrophotometer (NanoDrop 2000c; Thermo Fisher Scientific). Eighty to 100 ng of isolated DNA were used for PCR analysis using primers shown in Table 1. By using a thermal cycler (T100; Bio-Rad, Hercules, CA), PCR was performed in the following conditions: denature at 98 °C for 10 sec, annealing at 55 °C for 5 sec, extension at 72 °C for 40 sec, 40 cycles). PCR products were resolved in 1% agarose gels in 1X TAE buffer (40 mM tris-acetate, 1 mM EDTA) with 0.025% ethidium bromide. DNA was visualized by a UV lamp and imaged using an electrophoresis imaging system (AE-6932GXES; ATTO, Tokyo, Japan). The DNA bands were cut and purified by Monarch DNA Gel Extraction Kit (New England Biolabs, Ipswich, MA) and directly sequenced. Also, the PCR products were subcloned into a plasmid, after transformation, colony PCR was performed using the resultant bacterial colonies, and processed for Sanger sequencing. Candidate off-target sites were similarly examined to confirm that no off-target editing occurred (Supplementary Figure 2).

### Immunofluorescence

Briefly, after removing the medium, cells were fixed in 4% paraformaldehyde (PFA) for 30 min or 10min and washed with phosphate-buffered saline (PBS) for 5 min, three times. Cells were permeabilized with 0.3% Triton X-100 for 30 min. After washing with PBS for 5 min, three times, cells were treated with 1% bovine serum albumin (BSA) with or without 5% goat serum for 60 min, and incubated with primary antibodies at 4 °C overnight. Primary antibodies used in this study were as follows: anti-NANOG (diluted at 1:200; CST, Waltham, MA), anti-SSEA-4 (1:500; CST), anti-OCT4 (1:200; CST), anti-TRA-1-81(1:250; CST), anti-Kir7.1 (1:50, Cat. no. sc-398810; Santa Cruz Biotechnology, Dallas, TX), anti-ZO-1 (1:50; Thermo Fischer Scientific, Waltham, MA), anti-RPE65 (1:100; Abcam, Cambridge, UK), anti-ZO-1 (1:50; Thermo Fischer Scientific, Waltham, MA), anti-fibronectin (1: 3,000; Cat. no. ab2413, Abcam), anti-E-cadherin (1:100; Cat. no. 24E10, CST), anti-ezrin (1:500; Cat. no. E8897, Sigma-Aldrich, St. Louis, MO, USA) and normal rabbit IgG, Wako Pure Chemical Industries, Osaka,

Japan). After washing with PBS for 5 min, three times, cells were incubated with secondary antibodies for 30 min. Secondary antibodies used in this study were Alexa Fluor 488-conjugated goat anti-rabbit IgG (1: 1,000, Cat. no. A-11034; Thermo Fisher Scientific), Alexa Fluor 488-conjugated goat anti-mouse IgG (1: 1,000, Cat. no. A-11029; Thermo Fisher Scientific), and Alexa Fluor 568-conjugated goat anti-rabbit IgG (1: 1,000, Cat. no. A-11011; Thermo Fisher Scientific). After washing with PBS for 5 min, three times, cells were stained with DAPI for 15 min, with or without phalloidin for 45 min.
